# Supplementary material for: Fracture Resistance of Simulated Immature Teeth Obturated with Different Bioceramic and Resin-Based Sealers: An In vitro Single-Visit Apexification Study
Source: Research Square preprint supplement (doi:10.21203/rs.3.rs-7719969/v1), 2025-12-25
Supplement: Supplementary file 1 [file 364584b7d10ae87f06928118.xlsx]

## Sheet: Sheet1
	Mean	Std. Deviation	Std. Error	95% Confidence Interval for Mean		Median	Min.	Max.	p
				Lower Bound	Upper Bound
Group 1	439.15	243.57	55.88	321.75	556.54	368.654	194.38	985.08	0.264
Group 2	307.96	170.89	39.21	225.59	390.33	282.923	98.82	923.61
Group 3	339.06	108.67	24.3	288.2	389.92	322.034	172.71	579.62
Group 4	296.72	105.81	23.66	247.2	346.24	307.736	90.36	503.51
Group 5	280.63	102.09	23.42	231.43	329.84	303.825	113.27	435.9
Group 6	311.12	68.27	15.66	278.22	344.02	331.219	212.02	425.73
Total	328.91	150.78	14	301.18	356.64	306.997	90.36	985.08
Table 2.Comparison of maximum load measurements according to intervention groups
